# Supplementary material
Source: MDPI journal article supplement (https://www.mdpi.com/2072-6643/15/3/740)
Supplement: s1 [file s1]

Archive with 1 entries (1 files):
- nutrients-2146817-supplementary.pdf
